# Supplementary material for: Licochalcone A Prevents Platelet Activation and Thrombus Formation through the Inhibition of PLCγ2-PKC, Akt, and MAPK Pathways
Source: PubMed Central journal article supplement (PMC5535990; doi:10.3390/ijms18071500), 2017-07-12
Supplement: ijms-18-01500-s001.pdf [file ijms-18-01500-s001.pdf]

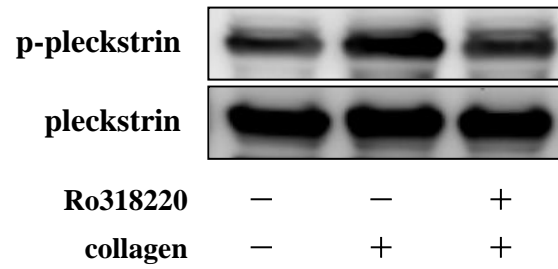

**Figure S1.** Effects of Ro318220 on the phosphorylation of pleckstrin. Washed human platelets were treated with collagen (1  $\mu\text{g}/\text{mL}$ ) to trigger platelet activation in the absence or presence of Ro318220 (2  $\mu\text{M}$ ). Profiles are representative of 3 similar experiments.

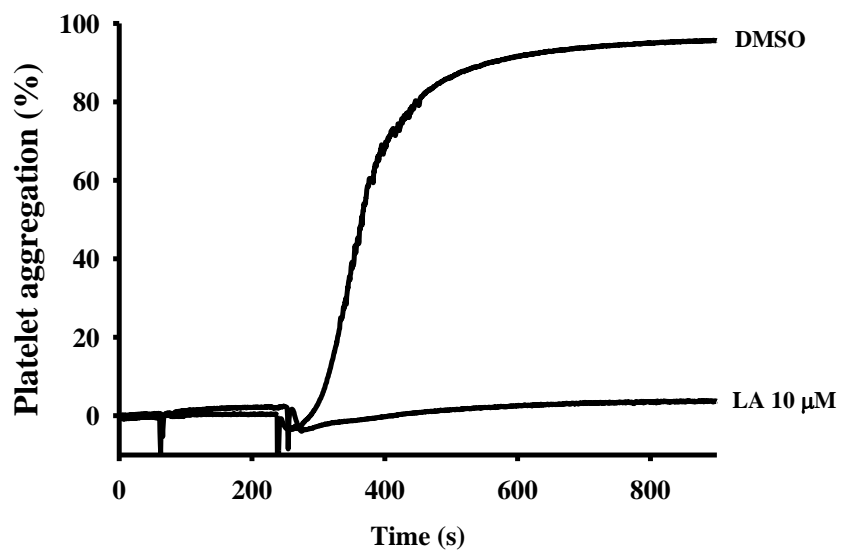

**Figure S2.** Effects of LA on AA-stimulated platelet aggregation in human platelets. Washed platelets were pre-incubated with LA (10  $\mu$ M), followed by treatment with 60  $\mu$ M AA to stimulate platelet aggregation. Profiles are representative of 3 similar experiments.

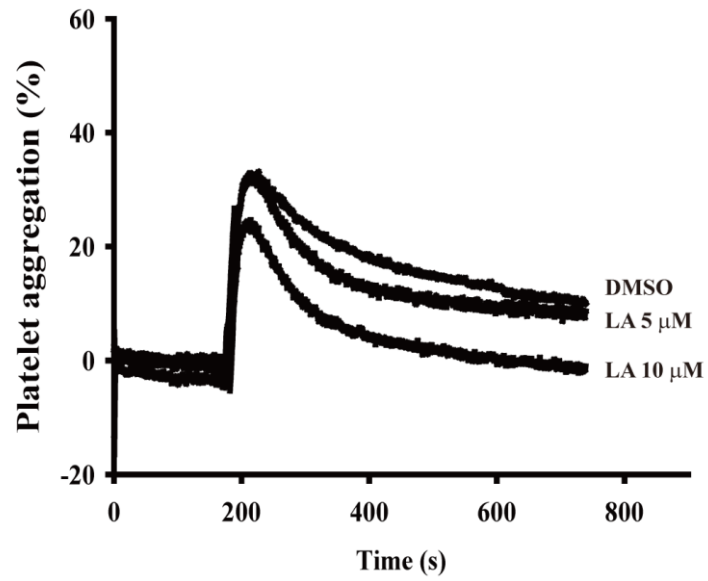

**Figure S3.** Effects of LA on ADP-stimulated platelet aggregation in mouse platelets. Mouse platelets were pre-incubated with LA (5 and 10  $\mu\text{M}$ ), followed by treatment with 5  $\mu\text{M}$  ADP to stimulate platelet aggregation. Profiles are representative of 3 similar experiments.
